# Supplementary material for: [18F]FDG-PET/CT in prone compared to supine position for optimal axillary staging and treatment in clinically node-positive breast cancer patients with neoadjuvant systemic therapy
Source: Springer Nature journal article supplement (doi:10.1186/s13550-021-00824-4), 2021-08-21
Supplement: MOESM1 [file 19588302]

## SUPPLEMENTARY APPENDIX

van Loevezijn A.A., Stokkel M.P.M., Donswijk L.M., van Werkhoven E.D., van der Noordaa M.E.M, van Duijnhoven F.H., Vrancken Peeters M.T.F.D (2021). 18F-FDG PET/CT in prone compared to supine position for optimal axillary staging in breast cancer patients undergoing tailored axillary treatment after neoadjuvant systemic therapy according to the MARI-protocol. Breast Cancer Research and Treatment.

*Corresponding author:*

Marie-Jeanne T.F.D. Vrancken Peeters, Professor of Surgical Oncology

Netherlands Cancer Institute - Antoni van Leeuwenhoek

E-mail: [m.vrancken@nki.nl](mailto:m.vrancken@nki.nl)

**Table S1.** Number of patients categorized in the same axillary staging groups with FDG-PET/CT in supine and prone position by both observers.

|                | Observer 1     |           |           |           |           |           |           |           | Total |         |
|----------------|----------------|-----------|-----------|-----------|-----------|-----------|-----------|-----------|-------|---------|
|                | Supine / Prone |           | N<4 / N4+ |           | N4+ / N<4 |           | N4+ / N4+ |           |       |         |
|                | N<4 / N<4      | N<4 / N4+ | N4+ / N<4 | N4+ / N4+ | N<4 / N<4 | N<4 / N4+ | N4+ / N<4 | N4+ / N4+ |       |         |
| Observer 2     |                |           |           |           |           |           |           |           |       |         |
| Supine / Prone |                |           |           |           |           |           |           |           |       |         |
| N<4 / N<4      | 92             | (60.1%)   | 1         | (0.7%)    | 0         | -         | 0         | -         | 93    | (60.8%) |
| N<4 / N4+      | 12             | (7.8%)    | 0         | -         | 1         | (0.7%)    | 1         | (0.7%)    | 14    | (9.2%)  |
| N4+ / N<4      | 2              | (1.3%)    | 0         | -         | 1         | (0.7%)    | 0         | -         | 3     | (1.9%)  |
| N4+ / N4+      | 5              | (3.3%)    | 3         | (1.9%)    | 3         | (1.9%)    | 32        | (20.9%)   | 43    | (28.1%) |
| Total          | 111            | (72.5%)   | 4         | (2.6%)    | 5         | (3.3%)    | 33        | (21.6%)   | 153   | (100%)  |

Data are N, (%). N<4 less than four FDG-positive axillary lymph nodes; N4+ more than four FDG-positive axillary nodes.
